# Supplementary material for: ESIPT-based fluorescent probe for cysteine sensing with large Stokes shift over homocysteine and glutathione and its application in living cells
Source: Royal Society of Chemistry journal article supplement (doi:10.1039/c9nj01259a), 2019-01-01
Supplement: c9nj01259a1.pdf [file c9nj01259a1.pdf]

Electronic Supporting Information for *New Journal of Chemistry*:

**ESIPT-based fluorescent probe for cysteine sensing with large Stokes shift over homocysteine and glutathione and its application in living cells**

Peng Zhang<sup>a</sup>, Yuzhe Xiao<sup>a</sup>, Qian Zhang<sup>a</sup>, Zixuan Zhang<sup>a</sup>, Hongwei Yu<sup>b</sup> and Caifeng Ding<sup>a\*</sup>

<sup>a</sup>*Key Laboratory of Sensor Analysis of Tumor Marker, Ministry of Education; Shandong Key Laboratory of Biochemical Analysis; Key Laboratory of Analytical Chemistry for Life Science in Universities of Shandong; College of Chemistry and Molecular Engineering. Qingdao University of Science and Technology, Qingdao 266042, PR China.*

<sup>b</sup>*Qingdao Municipal Center for Disease Control & Prevention, Qingdao 266033, PR China.*

\*E-mail: [dingcaifeng2003@163.com](mailto:dingcaifeng2003@163.com),

**Contents**

|                                                                            |      |
|----------------------------------------------------------------------------|------|
| 1. <sup>1</sup> H NMR and <sup>13</sup> C NMR spectra (Figures S1-S4)..... | S-2  |
| 2. Table S1.....                                                           | S-4  |
| 3. Figures S5 & S6.....                                                    | S-6  |
| 4. Figures S7 & S8.....                                                    | S-7  |
| 5. Figures S9 & S10.....                                                   | S-8  |
| 6. Figures S11 & S12.....                                                  | S-9  |
| 7. Figures S13 & References .....                                          | S-10 |

# 1. <sup>1</sup>H, <sup>13</sup>C NMR and HRMS spectra

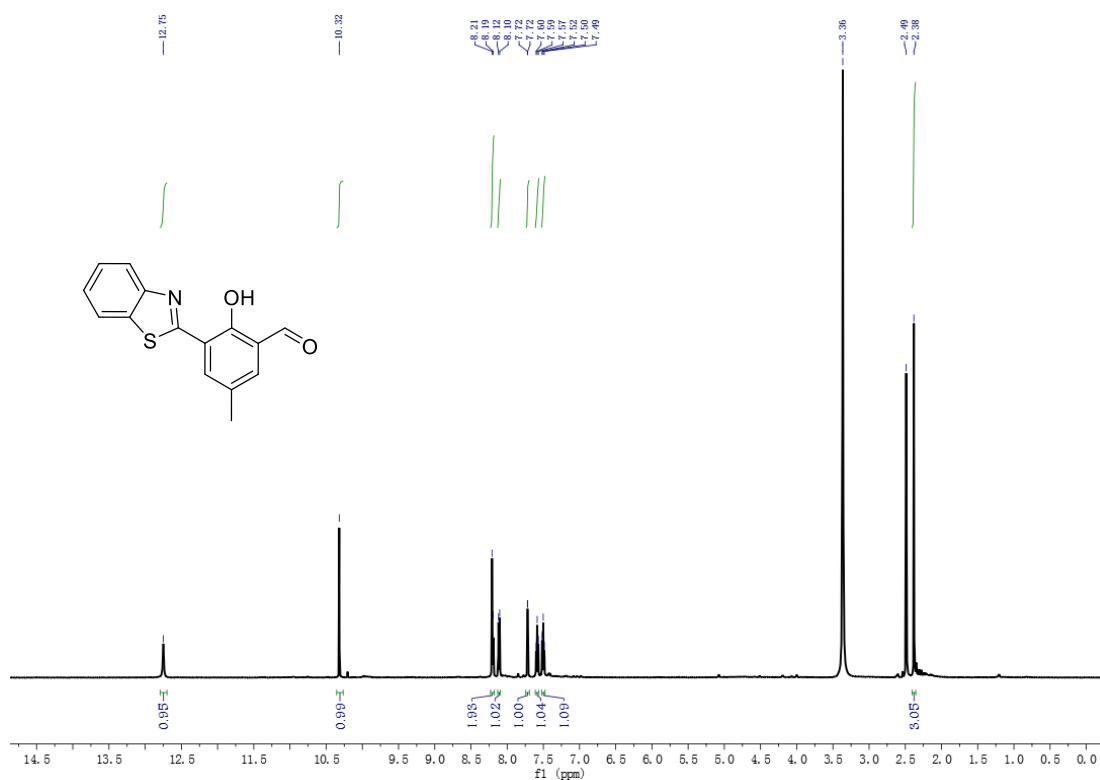

Figure S1. <sup>1</sup>H NMR spectrum (500 MHz) of HBTA in DMSO-*d*<sub>6</sub>.

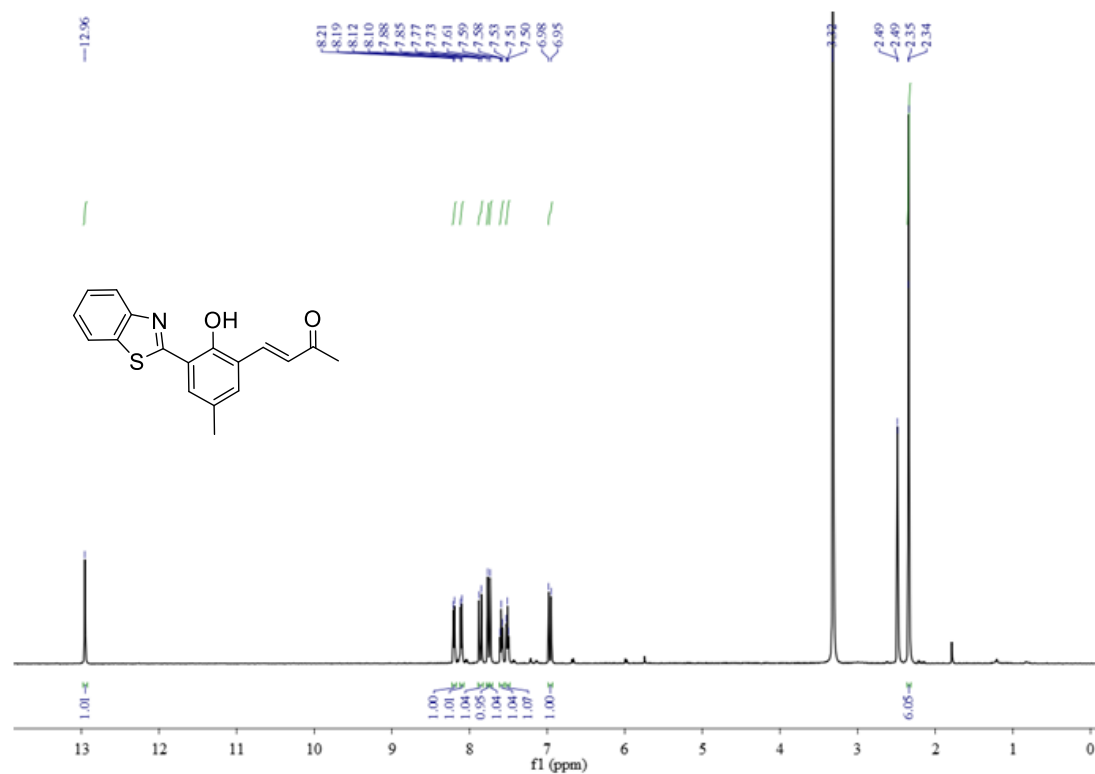

Figure S2. <sup>1</sup>H NMR spectrum (500 MHz) of HBTA-MVK in DMSO-*d*<sub>6</sub>.

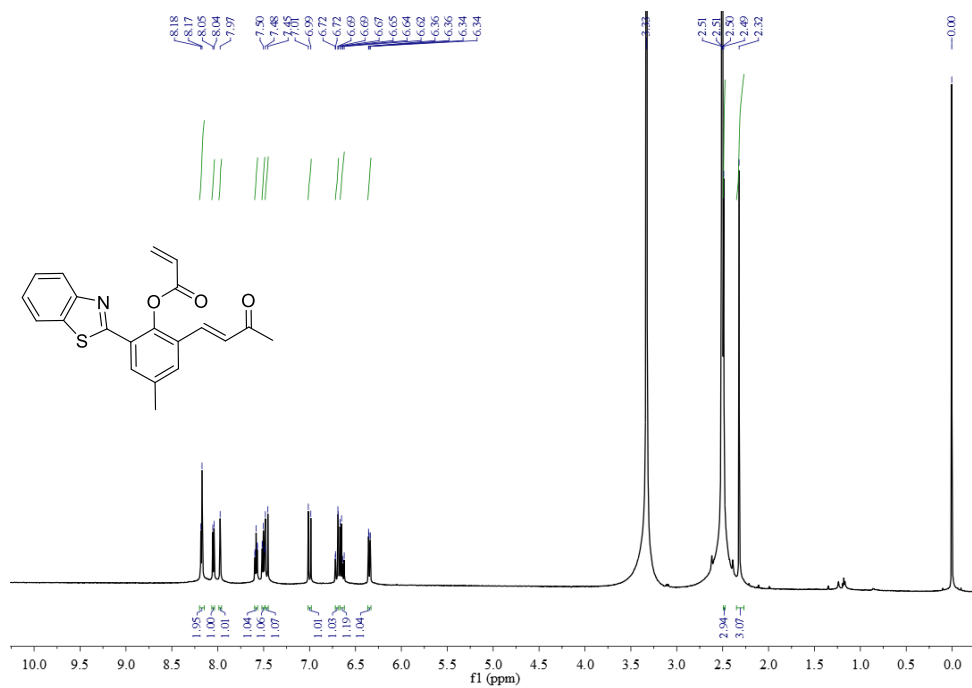

**Figure S3.** <sup>1</sup>H NMR spectrum (600 MHz) of ABT-MVK in DMSO-*d*<sub>6</sub>.

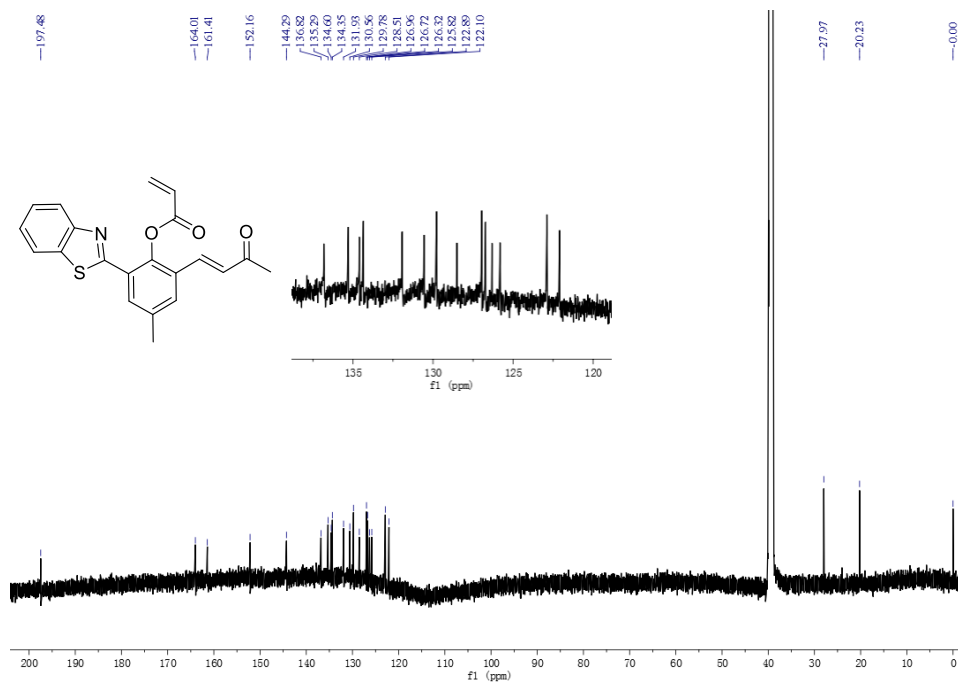

**Figure S4.** <sup>13</sup>C NMR spectrum (151 MHz) of ABT-MVK in DMSO-*d*<sub>6</sub>.

**Table S1.** Fluorescent probes for the detection of biothiols.

| Probe                                                                               | Analyte     | Stokes shift | LOD                    | Spectral change | Biological application        | Ref. |
|-------------------------------------------------------------------------------------|-------------|--------------|------------------------|-----------------|-------------------------------|------|
| 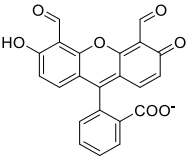   | Cys;<br>Hcy | 60           |                        | Off-on          | Human plasma                  | [1]  |
|    | Hcy         | 32           | 1.88 $\mu$ M           | Off-on          | Human plasma                  | [2]  |
|    | Cys         | 71           |                        | Off-on          |                               | [3]  |
|    | Cys;<br>GSH | 80<br>30     | 0.11 $\mu$ M<br>5.0 nM | Off-on          | HeLa Cells                    | [4]  |
|   | Cys;<br>GSH | 60<br>70     | 0.4 mM<br>0.05 $\mu$ M | Off-on          | COS-7 cells                   | [5]  |
|  | Cys         | 168          |                        | Ratio           | HeLa Tissue slices            | [6]  |
|  | Cys         | 130          | 1.4 $\mu$ M            | Ratio           | HeLa, Zebrafish               | [7]  |
|  | Cys;<br>Hcy | 85           |                        | Off-on          | Tetrahymena thermophila cells | [8]  |
|  | Cys         | ca. 210      | 88.0 nM                | Off-on          | MDA-MB-231 cells, mice        | [9]  |
|  | Cys         | 55           | 122 nM                 | Ratio           | A549/HeLa cells               | [10] |

|                                                                                     |             |         |                                      |        |             |           |
|-------------------------------------------------------------------------------------|-------------|---------|--------------------------------------|--------|-------------|-----------|
| 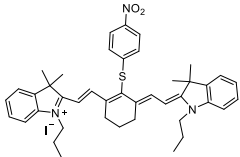   | Cys         | ca. 100 | 1.26 $\mu\text{M}$                   | Off-on | HeLa cells  | [11]      |
|    | Cys;<br>Hcy | 75      |                                      | Ratio  | HepG2 cells | [12]      |
|    | Cys         | ca. 42  |                                      | Off-on | PC-12 cells | [13]      |
|    | Cys;<br>Hcy | 51      | 16 $\mu\text{M}$<br>18 $\mu\text{M}$ | Ratio  | HepG2 cells | [14]      |
|    | Cys         | 25      | 0.38 nM                              | Off-on | HeLa cells  | [15]      |
|   | Cys         | ca. 45  | 84 nM                                | Ratio  | Hela cells  | [16]      |
|  | Cys;<br>GSH | ca. 160 | 90 nM                                | Off-on | Hela cells  | [17]      |
|  | Cys;<br>Hcy | ca. 140 |                                      | Ratio  | Hela cells  | [18]      |
|  | Cys         | 40      | 0.19 $\mu\text{M}$                   | Off-on | HeLa cells  | [19]      |
|  | Cys         | 200     |                                      | Ratio  | HeLa cells  | [20]      |
|  | Cys         | 225     | 19 nM                                | Off-on | HeLa cells  | this work |

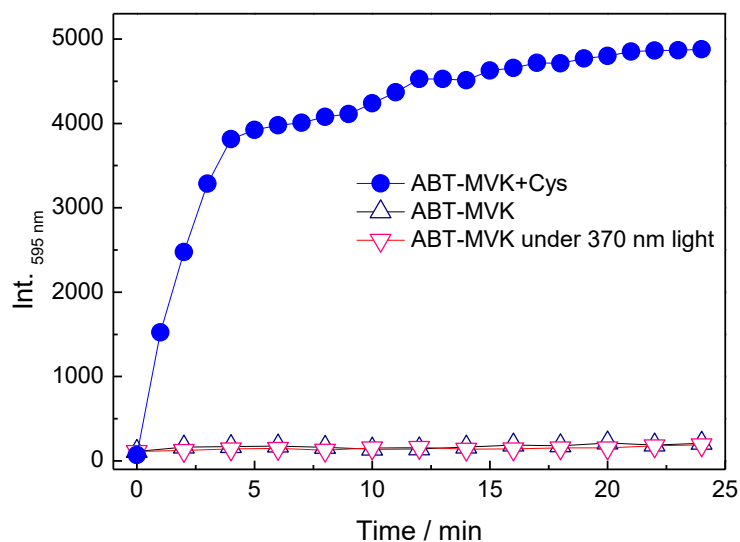

**Figure S5.** The stability of ABT-MVK (10  $\mu$ M) in PBS buffer with (black triangles) or without (red triangles) 370 nm light irritation.

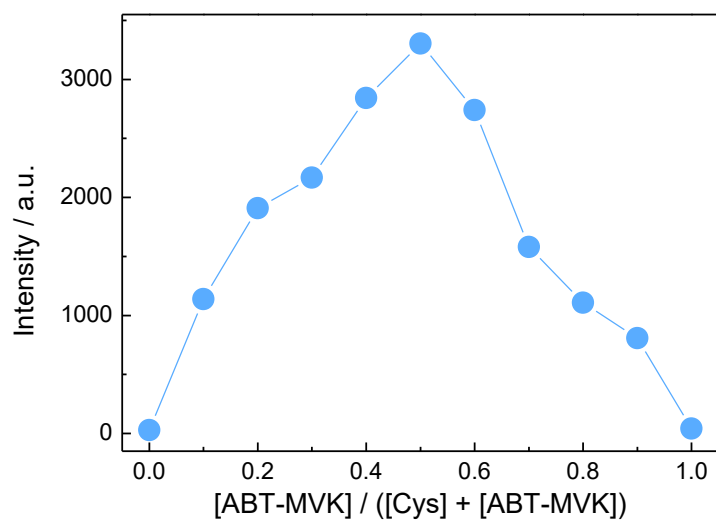

**Figure S6.** Job plot of Cys binding to ABT-MVK in 10 mM PBS buffer, measured by fluorescence spectra.

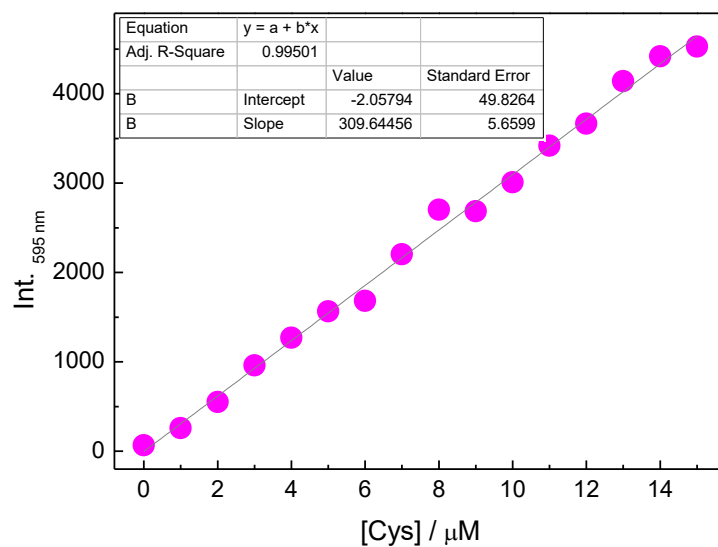

**Figure S7.** The limit of detection for Cys by fluorescence of ABT-MVK at 10  $\mu\text{M}$ . The limit of detection was calculated to be 19 nM.

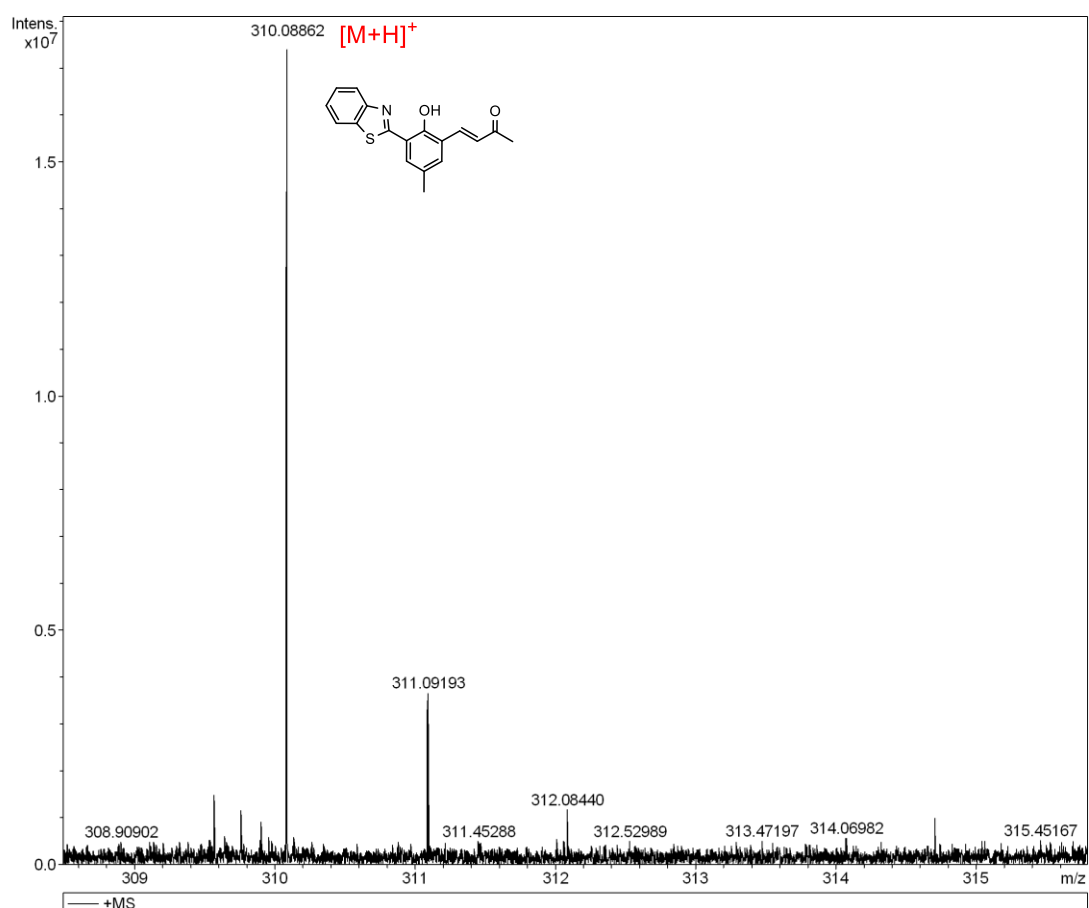

**Figure S8.** HRMS spectra of ABT-MVK before (a) and after (b) treated with Cys in 10 mM PBS buffer.  $[\text{ABT-MVK}] = [\text{Cys}] = 10 \mu\text{M}$ .

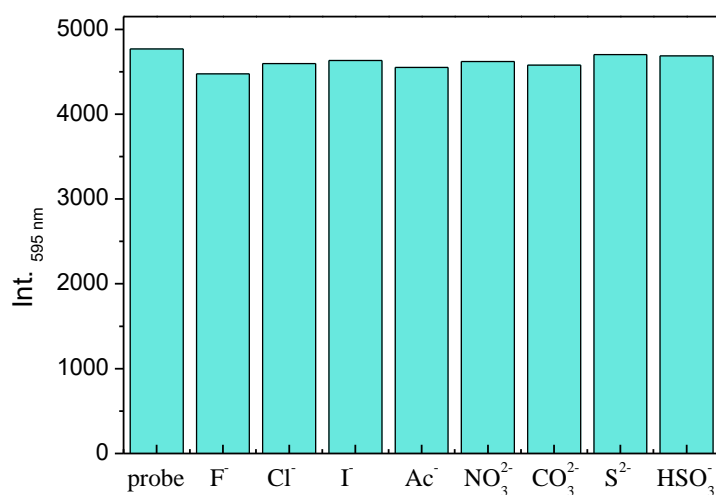

**Figure S9.** Fluorescence intensity of ABT-MVK at 595 nm in 10 mM PBS buffer pH 8.0 in the presence of 20  $\mu\text{M}$  Cys upon addition of 50  $\mu\text{M}$  of competition anions, such as F<sup>-</sup>, Cl<sup>-</sup>, I<sup>-</sup>, Ac<sup>-</sup>, NO<sub>3</sub><sup>-</sup>, CO<sub>3</sub><sup>2-</sup>, S<sup>2-</sup>, and HSO<sub>3</sub><sup>-</sup>. [ABT-MVK] = 10  $\mu\text{M}$ ,  $\lambda_{\text{ex}}$  = 370 nm.

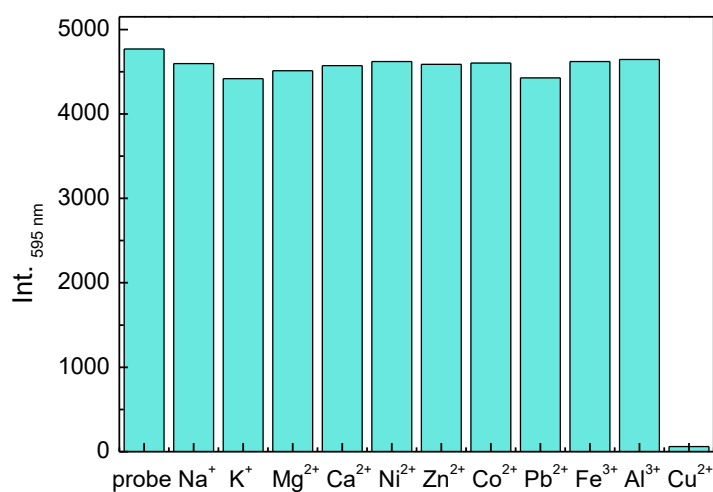

**Figure S10.** Fluorescence intensity of ABT-MVK at 595 nm in 10 mM PBS buffer pH 8.0 in the presence of 20  $\mu\text{M}$  Cys upon addition of 50  $\mu\text{M}$  of competition cations, such as Na<sup>+</sup>, K<sup>+</sup>, Mg<sup>2+</sup>, Ca<sup>2+</sup>, Ni<sup>2+</sup>, Zn<sup>2+</sup>, Co<sup>2+</sup>, Pb<sup>2+</sup>, Fe<sup>3+</sup>, Al<sup>3+</sup> and Cu<sup>2+</sup>. [ABT-MVK] = 10  $\mu\text{M}$ ,  $\lambda_{\text{ex}}$  = 370 nm.



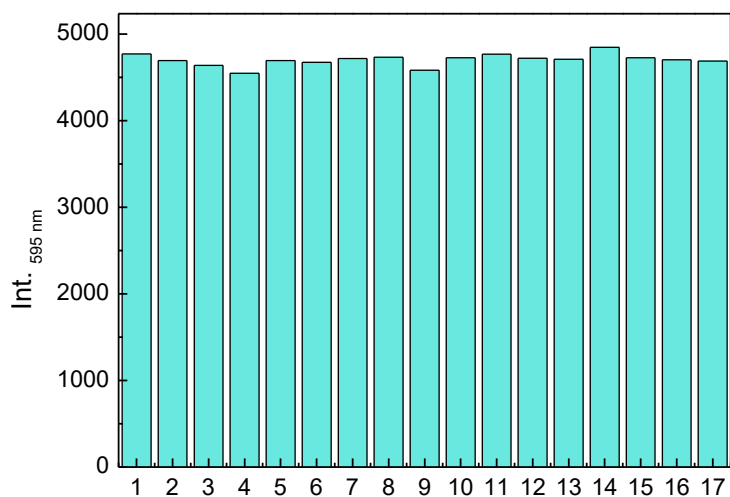

**Figure S11.** Fluorescence intensity of ABT-MVK at 595 nm in 10 mM PBS buffer pH 8.0 in the presence of 20  $\mu\text{M}$  Cys upon addition of 50  $\mu\text{M}$  competition amino acids, 1-17: Free, Ala, Asp, Gln, Glu, Gly, His, Ile, Leu, Lys, Met, Pro, Ser, Thr, Val, Hcy and GSH.  $[\text{ABT-MVK}] = 10 \mu\text{M}$ ,  $\lambda_{\text{ex}} = 370 \text{ nm}$ .

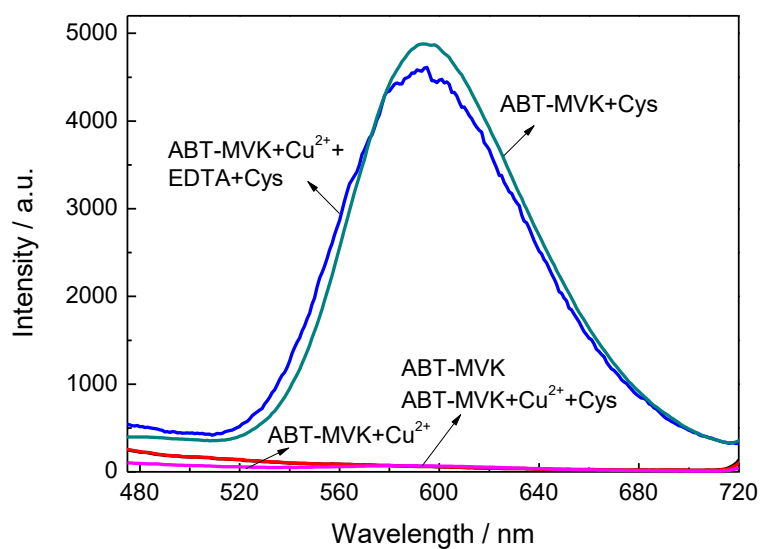

**Figure S12.** Fluorescence spectra of ABT-MVK, ABT-MVK+Cys, ABT-MVK+Cu<sup>2+</sup>, ABT-MVK+Cu<sup>2+</sup>+Cys and ABT-MVK+Cu<sup>2+</sup>+EDTA+Cys in 10 mM PBS buffer.  $[\text{ABT-MVK}] = 10 \mu\text{M}$ ,  $\lambda_{\text{ex}} = 370 \text{ nm}$ .

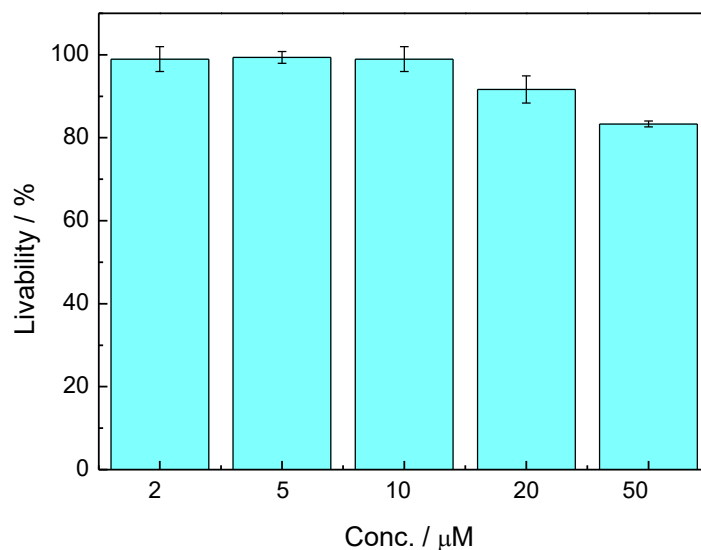

**Figure S13.** Cytotoxicity of ABT-MVK against HeLa cells as determined by CCK-8 assay: HeLa cells were treated with ABT-MVK (2-50  $\mu\text{M}$ ) for 2 hours.

## References

- [1] O. Rusin, N. N. St Luce, R. A. Agbaria, J. O. Escobedo, S. Jiang, I. M. Warner, F. B. Dawan, K. Lian, R. M. Strongin, *J. Am. Chem. Soc.* 2004, 126, 438-439.
- [2] A. Barve, M. Lowry, J. O. Escobedo, J. Thainashmuthu, R. M. Strongin, *J. Fluoresc.* 2016, 26, 731-737.
- [3] X. F. Yang, Y. X. Guo, R. M. Strongin, *Org. Biomol. Chem.* 2012, 10, 2739-2741.
- [4] Y. Q. Tang, L. Y. Jin, B. Z. Yin, *Anal. Chim. Act.* 2017, 993, 87-95.
- [5] J. Liu, Y. Q. Sun, Y. Huo, *J. Am. Chem. Soc.* 2014, 136, 2, 574-577.
- [6] W. F. Niu, L. Guo, Y. H. Li, *Anal. Chem.* 2016, 88, 1908-1914.
- [7] L. W. He, X. L. Yang, K. X. Xu, *Anal. Chem.* 2017, 89, 9567-9573.
- [8] P. Wang, J. Liu, X. Lv, Y. L. Liu, Y. Zhao, W. Guo, *Org. Lett.* 2012, 14, 520-523.
- [9] M. M. Zhang, L. Wang, Y. Y. Zhao, F. Q. Wang, J. D. Wu, G. L. Liang, *Anal. Chem.* 2018, 90, 4951-4954.
- [10] X. Xie, C. Yin, Y. Yue, 2018, 267, 76-82.
- [11] Y. S. Guan, L. Y. Niu, Y. Z. Chen, L. Z. Wu, Q. Z. Yang, *RCS Adv.* 2014, 4, 8360-8364.
- [12] L. Yuan, W. Lin, Y. Xie, S. Zhu, S. Zhao, *Chem. Eur. J.* 2012, 18, 14520-14526.

- [13] H. Wang, G. Zhou, H. Gai, X. Chen, *Chem. Commun.* 2012, 48, 8341-8343.
- [14] H. Lv, X. F. Yang, Y. Zhong, Y. Guo, Z. Li, H. Li, *Anal. Chem.* 2014, 86, 1800-1807.
- [15] Y. Liu, X. Lv, M. Hou, Y. Shi, W. Guo, *Anal. Chem.* 2015, 87, 11475-11483.
- [16] X. Zhang, Y. Hang, W. Qu, Y. Yan, P. Zhao, J. Hua, *RSC. Adv.* 2016, 6, 20014-20020.
- [17] D. Zhang, Z. Yang, H. Li, Z. Pei, S. Sun, Y. Xu, *Chem. Commun.* 2016, 52, 749-752.
- [18] P. Das, A. K. Mandal, N. B. Chandar, M. Baidya, H. B. Bhatt, B. Ganguly, S. K. Ghosh, A. Das, *Chem. Eur. J.* 2012, 18, 15382-15393
- [19] H. Chen, Y. Tang, M. Ren, W. Lin, *Chem. Sci.* 2016, 7, 1896-1903
- [20] S Yang, C. C. Guo, Y. Li, J. R. Guo, J. Xiao, Z. H. Qing, J. S. Li, and R. H. Yang, *ACS Sens.* 2018,3, 2415–2422.
